# Supplementary material
Source: PubMed Central journal article supplement (PMC6436996)
Supplement: NIHMS1520432-supplement-agreement_to_pay.pdf [file NIHMS1520432-supplement-agreement_to_pay.pdf]

**From:** Nicholas J. Leeper [nleeper@stanford.edu](mailto:nleeper@stanford.edu)  
**Subject:** RE: ATVB/2018/311569R1-REGARDING YOUR ACCEPTED PAPER-REQUIRES A RESPONSE  
**Date:** January 15, 2019 at 7:55 AM  
**To:** [atvb@atvb.org](mailto:atvb@atvb.org)

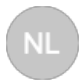

Sounds good, thanks.  
Agree with color online and black and white in print.  
Appreciate your help with this review.  
Nick

---

**From:** [atvb@atvb.org](mailto:atvb@atvb.org) [<mailto:atvb@atvb.org>]  
**Sent:** Tuesday, January 15, 2019 5:53 AM  
**To:** Nicholas J. Leeper <[nleeper@stanford.edu](mailto:nleeper@stanford.edu)>  
**Cc:** Nicholas J. Leeper <[nleeper@stanford.edu](mailto:nleeper@stanford.edu)>  
**Subject:** ATVB/2018/311569R1-REGARDING YOUR ACCEPTED PAPER-REQUIRES A RESPONSE

ATVB/2018/311569R1  
Nanoparticle Therapy for Vascular Diseases

Dear Dr. Leeper:

We are preparing your Brief Review for production and need a confirmatory email response saying that you have read and agree to the outline of charges listed below.

ATVB will waive seven (7) printed pages. Anything over that are at the authors expense. Please note that 5500 words with some figures and tables generally results in seven (7) printed proof pages. If your paper exceeds seven (7) printed proof pages at the production stage, you are responsible for additional page charges of \$70 per page after seven (7) pages. Authors are also responsible for the cost of all color figures: Fee per printed color page equals \$653.00. You can publish your figures in color online and black and white in print; this option is free of charge.

We cannot process your paper until we hear from you regarding this matter. Please e-mail the Editorial Office to let us know that you are willing to accept the charges for the production of your article.

Sincerely,

Arteriosclerosis, Thrombosis, and Vascular Biology
